# Supplementary material for: Expansion of RiPP biosynthetic space through integration of pan-genomics and machine learning uncovers a novel class of lanthipeptides
Source: PLoS Biol. 2020 Dec 22;18(12):e3001026. doi: 10.1371/journal.pbio.3001026 (PMC7794033; doi:10.1371/journal.pbio.3001026)
Supplement: S5 Data — (XLSX) [file pbio.3001026.s026.xlsx]

## Sheet: Primers
Primer name	Primer sequence
sprR_F	gatc GAATTC CAT ATGACCGTCAACGACCTGTCC
sprR_R	gatc TCTAGA CGCGGCCCACGGATCAGACC
spr_LF_F	gatc GAATTC CTCGCGGCCCTCGGCATTCTGG
spr_LF_R	gcta TCTAGA GTGGCGTGCGCGGCGTTGG
spr_RF_F	gcta TCTAGA CGCCCGGAAACAGGCATGAAGG
spr_RF_R	gcta AAGCTT ATGTCGCGGTGGACGACACCC
spr_del_check_F	GGGCTACATGCCTACTTTGC
spr_del_check_R	GTGCCCTCTGATTCCTTTCC

## Sheet: Plasmids
Plasmid name	Description	Reference
pSET152	Integrative E. coli / Streptomyces shuttle vector.	Bierman et al.
pHJL401	E. coli/Streptomyces shuttle vector with intermediate copy number.	Larson et al.
pWHM3	Unstable E. coli/Streptomyces shuttle vector with high copy number; used for homologous recombination	Vara et al.
pUWLCRE	Unstable E. coli/Streptomyces shuttle vector containing the Cre recombinase enzyme. behind a constitutive promoter.	Fedoryshyn et al.
pAK1	pSET152 containing sprR behind GAP promoter from S. coelicolor (SCO1947).	This work.
pAK2	pHJL401 containing sprR behind GAP promoter from S. coelicolor (SCO1947).	This work.
pAK3	pWHM3 containing regions flanking the SpR gene cluster.	This work.
